# Supplementary material for: Effect of impregnation strategy on structural characteristics of Ce–Mn/Al2O3 and its catalytic ozonation of benzoic acid
Source: Royal Society of Chemistry journal article supplement (doi:10.1039/d4ra06148a), 2024-01-01
Supplement: d4ra06148a1.pdf [file d4ra06148a1.pdf]

## Effect of impregnation strategy on structural characteristics of Ce-Mn/Al<sub>2</sub>O<sub>3</sub> and its catalytic ozonation of benzoic acid

Shengjuan Shao <sup>a\*</sup>, Ting Cheng <sup>b</sup>, Yifan Cheng <sup>a</sup>, Bingxin Chen <sup>a</sup>

<sup>a</sup>. Department of Chemistry and Chemical Engineering, Taiyuan Institute of Technology, Taiyuan, 030008, China

<sup>b</sup>. School of Chemistry and Chemical Engineering, North University of China, Taiyuan, Shanxi 030051, China

\*Corresponding author

E-mail: shaosj\_tit@163.com

### Figures and Tables

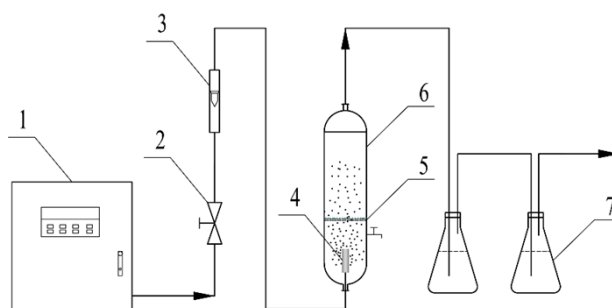

1-ozone generator ; 2-valve ; 3-gas flow meter ; 4-bubble aerator ; 5-porous separator ; 6-column reactor ; 7-KI absorbent

**Figure S1** Process flow diagram of heterogeneous catalytic ozonation of benzoic acid wastewater

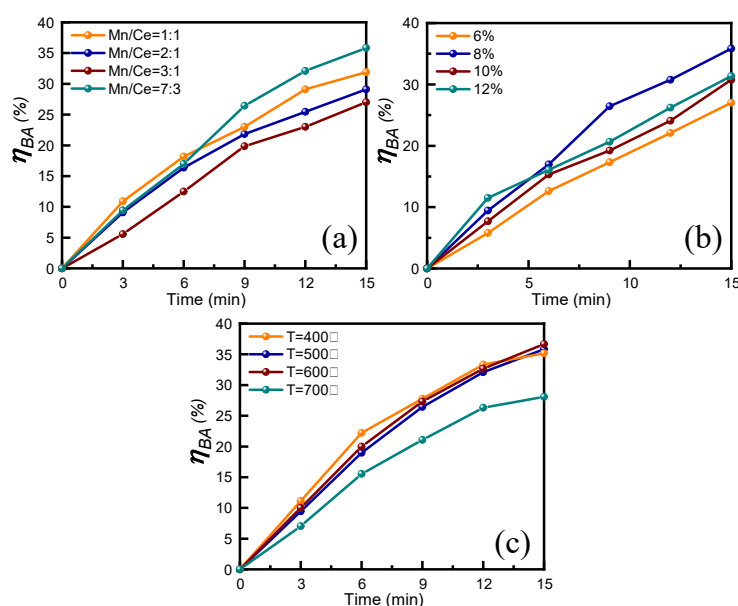

**Figure S2** Effect of catalyst preparation parameters on catalytic activity of Ce-Mn/Al<sub>2</sub>O<sub>3</sub>: (a) the

effects of different Mn to Ce molar ratios (Mn/Ce); (b) the effects of different metal loadings, (c) the effects of different calcination temperature (T). ( $[BA]_0 = 50 \text{ mg L}^{-1}$ ,  $V_L = 1000 \text{ mL}$ ,  $m_s = 0.5 \text{ g L}^{-1}$ ,  $V_{O_3} = 0.5 \text{ L min}^{-1}$ ,  $C_{O_3} = 7.5 \text{ mg L}^{-1}$ )

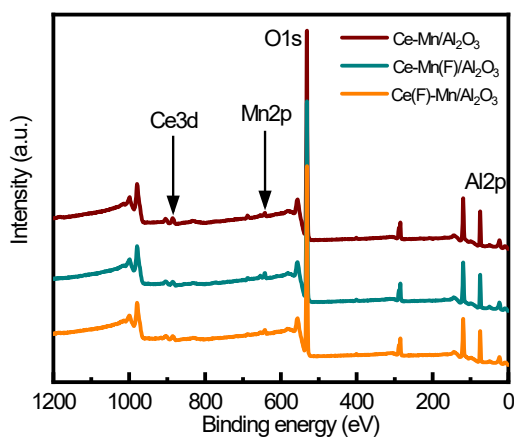

Figure S3 The XPS survey spectra of Ce-Mn/Al<sub>2</sub>O<sub>3</sub>, Ce-Mn(F)/Al<sub>2</sub>O<sub>3</sub> and Ce(F)-Mn/Al<sub>2</sub>O<sub>3</sub>.

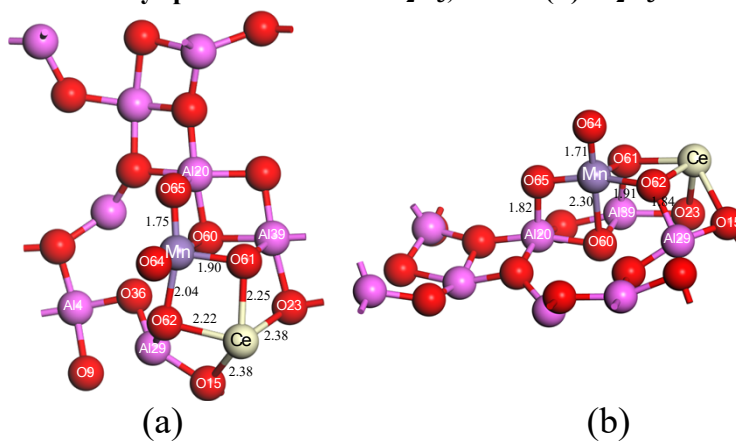

Figure S4 Top view (a) and side view (b) of Ce-Mn/Al<sub>2</sub>O<sub>3</sub> (110) surface

Table S1 BET surface area, total pore volume and average pore size of Ce-Mn/Al<sub>2</sub>O<sub>3</sub> with different metal loadings.

| Metal loadings (wt.)           | $S_{\text{BET}}$ (m <sup>2</sup> /g) | $V_p$ (cm <sup>3</sup> /g) | $D_a$ (nm) |
|--------------------------------|--------------------------------------|----------------------------|------------|
| 6%                             | 218.41                               | 0.74                       | 12.59      |
| 8%                             | 217.07                               | 0.67                       | 12.34      |
| 10%                            | 216.57                               | 0.67                       | 12.45      |
| 12%                            | 220.00                               | 0.67                       | 12.22      |
| Al <sub>2</sub> O <sub>3</sub> | 249.49                               | 0.81                       | 9.55       |

Table S2 Al, Mn, Ce and O contents of Ce-Mn/Al<sub>2</sub>O<sub>3</sub>, Ce-Mn(F)/Al<sub>2</sub>O<sub>3</sub> and Ce(F)-Mn/Al<sub>2</sub>O<sub>3</sub> by XPS.

| Catalyst                             | Al (wt. %) | Mn (wt. %)/(at. %) | Ce (wt. %)/(at. %) | O (wt. %) |
|--------------------------------------|------------|--------------------|--------------------|-----------|
| Ce-Mn/Al <sub>2</sub> O <sub>3</sub> | 44.35      | 1.72/0.65          | 3.75/0.55          | 50.17     |

|                                             |       |           |           |       |
|---------------------------------------------|-------|-----------|-----------|-------|
| Ce-<br>Mn(F)/Al <sub>2</sub> O <sub>3</sub> | 44.71 | 2.05/0.77 | 3.47/0.51 | 49.76 |
| Ce(F)-Mn/<br>Al <sub>2</sub> O <sub>3</sub> | 44.52 | 2.48/0.93 | 3.07/0.45 | 49.93 |

**Table S3 Al, Mn, Ce and O contents of Ce-Mn/Al<sub>2</sub>O<sub>3</sub> before and after ozonation by XPS.**

| Catalyst | Al (wt. %) | Mn (wt. %) | Ce (wt. %) | O (wt. %) |
|----------|------------|------------|------------|-----------|
| before   | 44.35      | 1.72       | 3.75       | 50.17     |
| after    | 44.73      | 1.42       | 3.07       | 50.78     |

**Original data of Figure 8(a)**

| Time(min) | $\eta_{pH=5}$ | $\eta_{pH=6}$ | $\eta_{pH=7}$ | $\eta_{pH=8}$ | $\eta_{pH=9}$ |
|-----------|---------------|---------------|---------------|---------------|---------------|
| 5         | 11.32±0.56    | 9.61±0.54     | 11.11±0.65    | 14.04±0.62    | 12.53±0.58    |
| 10        | 20.75±0.96    | 19.23±1.42    | 20.37±1.6     | 26.32±1.65    | 24.56±1.62    |
| 15        | 30.19±1.24    | 26.92±1.44    | 29.62±1.76    | 40.35±1.84    | 35.33±1.64    |
| 20        | 39.62±1.7     | 32.69±1.72    | 37.03±1.72    | 47.37±1.92    | 42.11±1.8     |
| 25        | 48.11±2       | 40.38±1.76    | 44.44±1.88    | 54.14±2.12    | 48.88±1.96    |
| 30        | 53.72±2.04    | 46.15±2.1     | 48.14±2.26    | 59.65±2.46    | 54.39±2.08    |

**Original data of Figure 8(b)**

| Time(min) | $\eta_{ms=0.4}$ | $\eta_{ms=0.5}$ | $\eta_{ms=0.6}$ | $\eta_{ms=0.7}$ |
|-----------|-----------------|-----------------|-----------------|-----------------|
| 5         | 12.28±0.53      | 12.5±0.57       | 16.95±0.65      | 11.86±0.55      |
| 10        | 22.81±1.06      | 26.79±1.53      | 30.51±1.63      | 23.73±1.15      |
| 15        | 33.33±1.22      | 39.29±1.44      | 42.37±1.84      | 33.9±1.36       |
| 20        | 42.11±1.74      | 46.43±1.72      | 52.54±1.91      | 40.68±1.52      |
| 25        | 50.88±1.97      | 53.57±2.02      | 55.74±2.18      | 47.46±1.88      |
| 30        | 54.39±2.06      | 58.93±2.26      | 59.32±2.35      | 49.15±2.06      |

**Original data of Figure 8(c)**

| Time(min) | $\eta$ | $\eta_{CO_3}$ | $\eta_{Cl}$ | $\eta_{HPO_4}$ |
|-----------|--------|---------------|-------------|----------------|
| 5         | 15.38  | 3.39          | 10.31       | 12             |
| 10        | 26.92  | 5.08          | 18.15       | 22             |
| 15        | 36.54  | 6.78          | 23.92       | 32             |
| 20        | 44.23  | 8.47          | 27.85       | 41             |
| 25        | 51.92  | 10.17         | 30.77       | 49             |

---

|    |       |       |       |    |
|----|-------|-------|-------|----|
| 30 | 57.69 | 13.56 | 32.69 | 54 |
|----|-------|-------|-------|----|

---

**Original data of Figure 9**

---

| Time(min) | <i>1<sup>st</sup> run</i> | <i>2<sup>nd</sup> run</i> | <i>3<sup>rd</sup> run</i> | <i>4<sup>th</sup> run</i> | <i>5<sup>th</sup> run</i> |
|-----------|---------------------------|---------------------------|---------------------------|---------------------------|---------------------------|
| 5         | 14.28                     | 14.04                     | 14.03                     | 14.28                     | 10.52                     |
| 10        | 28.57                     | 26.32                     | 26.31                     | 23.21                     | 24.56                     |
| 15        | 39.28                     | 40.35                     | 40.35                     | 37.5                      | 36.84                     |
| 20        | 48.21                     | 47.37                     | 47.36                     | 46.42                     | 43.85                     |
| 25        | 53.57                     | 56.14                     | 56.140                    | 53.57                     | 48.36                     |
| 30        | 58.92                     | 59.65                     | 59.64                     | 57.14                     | 54.38                     |

---
